# Supplementary material for: Fecal microbiota transplantation improves VPA-induced ASD mice by modulating the serotonergic and glutamatergic synapse signaling pathways
Source: PubMed Central journal article supplement (PMC9859809; doi:10.1038/s41398-023-02307-7), 2023-01-21

**A**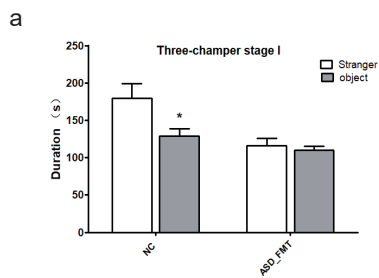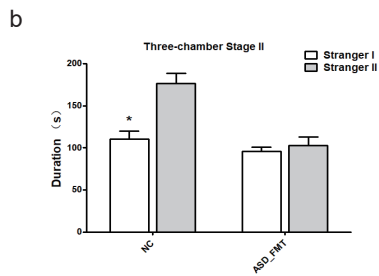**B**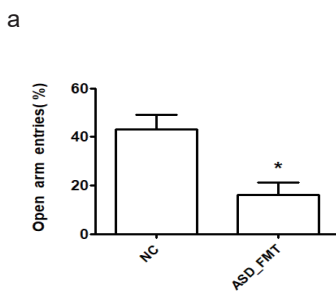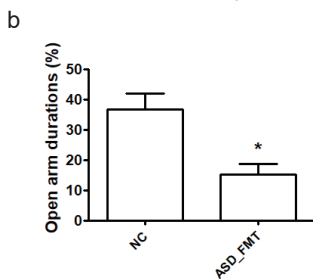**C**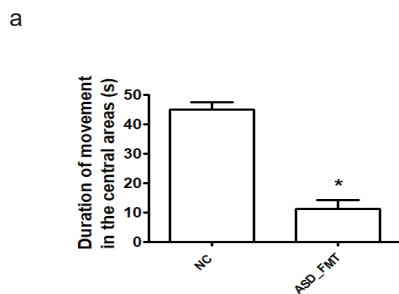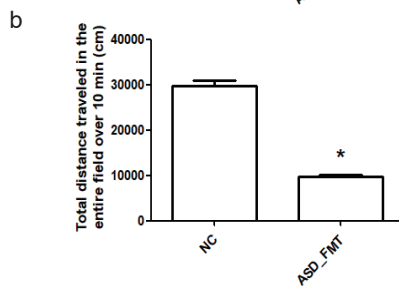

Supplement: 41398_2023_2307_MOESM2_ESM.pdf [file 41398_2023_2307_MOESM2_ESM.pdf]
